# Supplementary material for: Stochasticity in space, persistence in time: genetic heterogeneity in harbour populations of the introduced ascidianStyela plicata
Source: PeerJ journal article supplement (doi:10.7717/peerj.2158), 2016-06-23

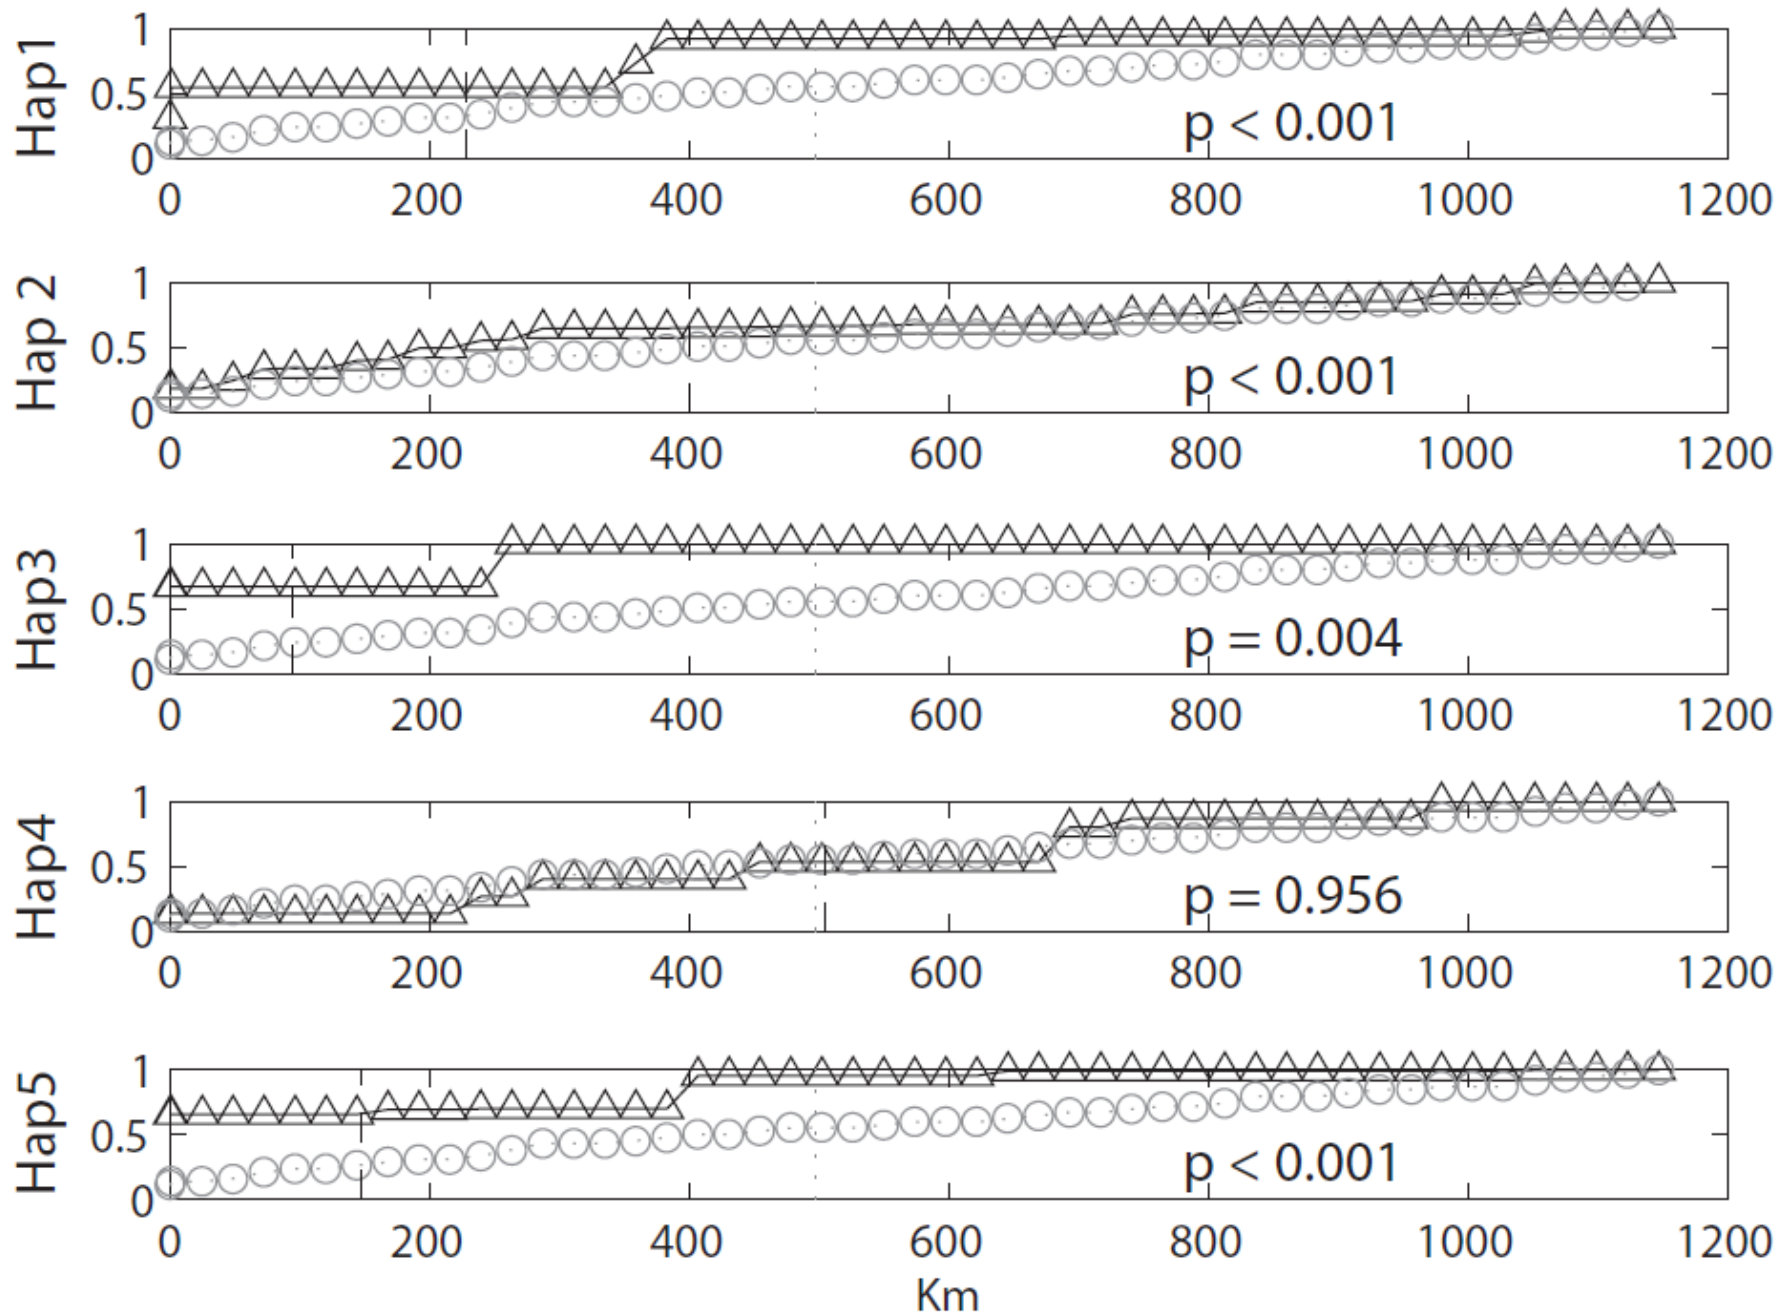

Supplement: Figure_S2.pdf [file Figure_S2.pdf]
