# Supplementary material for: Stochasticity in space, persistence in time: genetic heterogeneity in harbour populations of the introduced ascidian Styela plicata
Source: PubMed Central journal article supplement (PMC4924124; doi:10.7717/peerj.2158), 2016-06-23

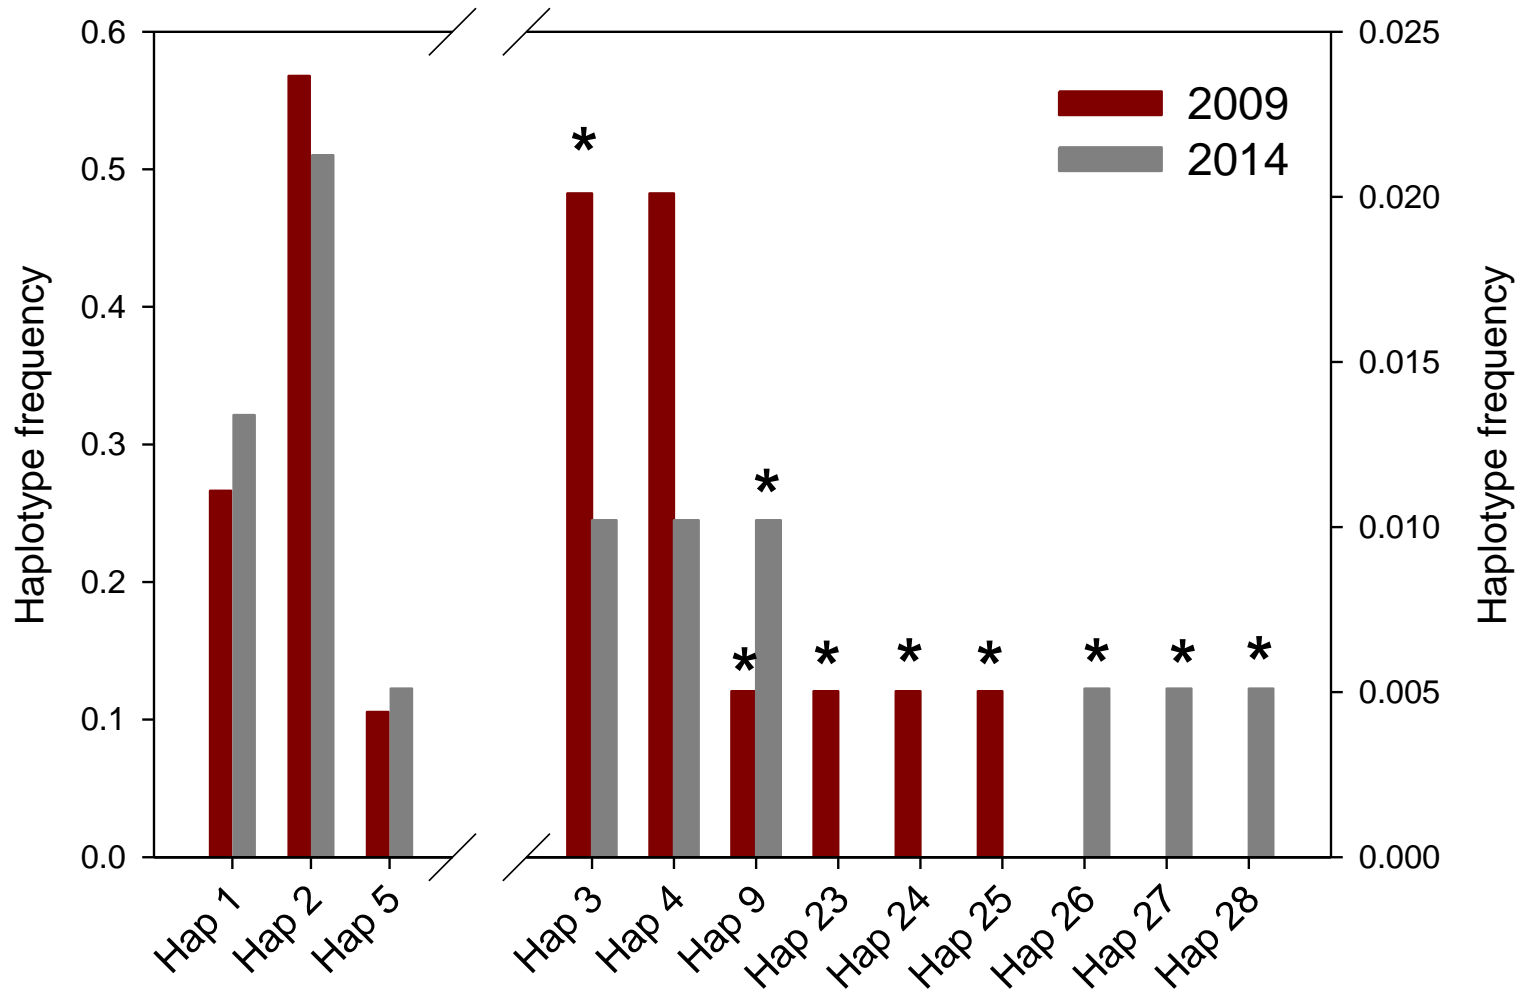

Supplement: peerj-04-2158-s001.pdf [file peerj-04-2158-s001.pdf]
